# Supplementary material
Source: publisher site journal article supplement (https://www.dovepress.com/article/504028)
Supplement: Supplementary file 1 [file get_supplementary_file.php]

**Identifying and Validating Prognostic Hyper- and Hypo-inflammatory COVID-19 Clinical Phenotypes Using Machine Learning Methods**

**Online Supplementary**

**Correlation Matrix**

**age-hct**

|  | age | crp | wbc | ne_per | ne_num | ly_per | ly_num | mo_per | mo_num | eo_per | eo_num | ba_per | ba_num | rbc | hgb | hct |
| --- | --- | --- | --- | --- | --- | --- | --- | --- | --- | --- | --- | --- | --- | --- | --- | --- |
| age | 1.00 | 0.19 | 0.01 | 0.19 | 0.04 | -0.21 | -0.01 | 0.01 | -0.01 | -0.12 | -0.10 | -0.05 | -0.05 | -0.12 | -0.07 | -0.05 |
| crp | 0.19 | 1.00 | 0.12 | 0.39 | 0.32 | -0.39 | -0.06 | -0.12 | 0.05 | -0.20 | -0.16 | -0.06 | -0.04 | -0.14 | -0.15 | -0.09 |
| wbc | 0.01 | 0.12 | 1.00 | 0.08 | 0.52 | 0.02 | 0.83 | -0.25 | 0.40 | -0.09 | -0.01 | -0.06 | 0.17 | 0.02 | 0.01 | 0.05 |
| ne_per | 0.19 | 0.39 | 0.08 | 1.00 | 0.63 | -0.94 | -0.29 | -0.47 | -0.08 | -0.39 | -0.28 | -0.18 | -0.10 | 0.01 | -0.03 | 0.03 |
| ne_num | 0.04 | 0.32 | 0.52 | 0.63 | 1.00 | -0.55 | -0.04 | -0.41 | 0.33 | -0.21 | -0.08 | -0.11 | 0.08 | 0.10 | 0.07 | 0.10 |
| ly_per | -0.21 | -0.39 | 0.02 | -0.94 | -0.55 | 1.00 | 0.38 | 0.19 | -0.07 | 0.26 | 0.16 | 0.14 | 0.07 | 0.02 | 0.05 | -0.01 |
| ly_num | -0.01 | -0.06 | 0.83 | -0.29 | -0.04 | 0.38 | 1.00 | -0.07 | 0.21 | 0.00 | 0.02 | 0.00 | 0.13 | -0.06 | -0.04 | -0.02 |
| mo_per | 0.01 | -0.12 | -0.25 | -0.47 | -0.41 | 0.19 | -0.07 | 1.00 | 0.49 | 0.08 | 0.01 | 0.03 | -0.03 | -0.04 | -0.03 | -0.04 |
| mo_num | -0.01 | 0.05 | 0.40 | -0.08 | 0.33 | -0.07 | 0.21 | 0.49 | 1.00 | -0.02 | 0.05 | -0.04 | 0.12 | 0.09 | 0.08 | 0.09 |
| eo_per | -0.12 | -0.20 | -0.09 | -0.39 | -0.21 | 0.26 | 0.00 | 0.08 | -0.02 | 1.00 | 0.94 | 0.09 | 0.05 | 0.00 | 0.02 | -0.02 |
| eo_num | -0.10 | -0.16 | -0.01 | -0.28 | -0.08 | 0.16 | 0.02 | 0.01 | 0.05 | 0.94 | 1.00 | 0.05 | 0.06 | 0.03 | 0.04 | 0.01 |
| ba_per | -0.05 | -0.06 | -0.06 | -0.18 | -0.11 | 0.14 | 0.00 | 0.03 | -0.04 | 0.09 | 0.05 | 1.00 | 0.89 | -0.01 | -0.01 | 0.05 |
| ba_num | -0.05 | -0.04 | 0.17 | -0.10 | 0.08 | 0.07 | 0.13 | -0.03 | 0.12 | 0.05 | 0.06 | 0.89 | 1.00 | 0.05 | 0.05 | 0.12 |
| rbc | -0.12 | -0.14 | 0.02 | 0.01 | 0.10 | 0.02 | -0.06 | -0.04 | 0.09 | 0.00 | 0.03 | -0.01 | 0.05 | 1.00 | 0.90 | 0.81 |
| hgb | -0.07 | -0.15 | 0.01 | -0.03 | 0.07 | 0.05 | -0.04 | -0.03 | 0.08 | 0.02 | 0.04 | -0.01 | 0.05 | 0.90 | 1.00 | 0.85 |
| hct | -0.05 | -0.09 | 0.05 | 0.03 | 0.10 | -0.01 | -0.02 | -0.04 | 0.09 | -0.02 | 0.01 | 0.05 | 0.12 | 0.81 | 0.85 | 1.00 |
| mcv | 0.14 | 0.00 | 0.09 | -0.08 | -0.02 | 0.07 | 0.12 | 0.05 | 0.05 | 0.03 | 0.03 | 0.03 | 0.03 | -0.34 | 0.05 | 0.00 |
| mch | 0.12 | -0.01 | 0.00 | -0.07 | -0.06 | 0.07 | 0.04 | 0.03 | -0.01 | 0.03 | 0.02 | 0.00 | -0.01 | -0.28 | 0.16 | 0.03 |
| mchc | 0.01 | -0.01 | -0.14 | 0.00 | -0.07 | 0.02 | -0.12 | -0.04 | -0.11 | 0.01 | 0.00 | -0.05 | -0.06 | 0.03 | 0.28 | 0.09 |
| rdw | -0.06 | 0.04 | 0.09 | -0.04 | 0.02 | 0.00 | 0.09 | 0.08 | 0.10 | 0.02 | 0.02 | 0.05 | 0.02 | -0.20 | -0.34 | -0.25 |
| plt | -0.15 | -0.08 | 0.13 | 0.05 | 0.24 | -0.05 | -0.02 | -0.08 | 0.21 | 0.06 | 0.11 | 0.02 | 0.09 | 0.07 | -0.01 | 0.02 |
| pctt | -0.16 | -0.08 | 0.16 | 0.05 | 0.28 | -0.03 | -0.01 | -0.11 | 0.22 | 0.05 | 0.11 | 0.02 | 0.09 | 0.12 | 0.04 | 0.06 |
| pdw | 0.00 | 0.04 | -0.02 | 0.09 | 0.07 | -0.10 | -0.07 | -0.02 | 0.04 | -0.01 | 0.00 | 0.01 | 0.03 | 0.07 | 0.10 | 0.09 |
| mpv | 0.02 | 0.03 | 0.05 | -0.01 | 0.03 | 0.05 | 0.05 | -0.06 | -0.05 | -0.06 | -0.05 | -0.02 | -0.01 | 0.08 | 0.10 | 0.05 |
| apoe | -0.07 | 0.03 | 0.00 | 0.06 | 0.07 | -0.04 | -0.04 | -0.05 | -0.03 | -0.04 | -0.03 | -0.01 | 0.02 | 0.05 | 0.07 | 0.06 |
| ldlc | -0.18 | -0.23 | -0.06 | -0.17 | -0.10 | 0.19 | -0.02 | -0.02 | -0.02 | 0.12 | 0.11 | 0.03 | 0.03 | 0.09 | 0.10 | 0.12 |
| hdlc | -0.03 | -0.21 | -0.06 | -0.07 | -0.07 | 0.08 | -0.02 | -0.01 | -0.03 | 0.01 | 0.01 | 0.00 | 0.00 | 0.07 | 0.10 | 0.10 |
| tch | -0.17 | -0.20 | -0.03 | -0.12 | -0.04 | 0.14 | -0.02 | -0.04 | 0.00 | 0.08 | 0.09 | 0.02 | 0.04 | 0.10 | 0.12 | 0.13 |
| tg | -0.21 | -0.05 | 0.06 | -0.03 | 0.08 | 0.03 | 0.01 | 0.00 | 0.09 | 0.02 | 0.04 | 0.02 | 0.05 | 0.07 | 0.09 | 0.04 |
| uapa | -0.13 | -0.37 | -0.09 | -0.22 | -0.18 | 0.23 | 0.00 | 0.04 | -0.06 | 0.07 | 0.06 | 0.02 | 0.00 | 0.13 | 0.14 | 0.11 |
| uapb | -0.14 | -0.05 | 0.02 | -0.03 | 0.05 | 0.05 | -0.02 | -0.07 | 0.04 | 0.03 | 0.05 | 0.01 | 0.06 | 0.12 | 0.13 | 0.14 |
| a_b_ratio | 0.00 | -0.22 | -0.09 | -0.12 | -0.16 | 0.11 | 0.01 | 0.08 | -0.08 | 0.03 | 0.00 | 0.01 | -0.03 | 0.00 | -0.01 | -0.02 |
| ck_mb | -0.07 | -0.03 | 0.05 | 0.09 | 0.10 | -0.09 | -0.01 | -0.01 | 0.04 | -0.06 | -0.05 | -0.02 | -0.01 | 0.06 | 0.03 | 0.06 |
| tni | -0.04 | 0.00 | 0.04 | 0.05 | 0.08 | -0.06 | -0.01 | 0.02 | 0.09 | -0.04 | -0.04 | -0.02 | -0.01 | 0.03 | 0.02 | 0.05 |
| myo | 0.09 | 0.22 | 0.09 | 0.22 | 0.22 | -0.20 | -0.03 | -0.11 | 0.00 | -0.11 | -0.09 | -0.05 | -0.03 | -0.04 | -0.05 | -0.01 |
| nt_probnp | 0.09 | 0.20 | 0.03 | 0.16 | 0.10 | -0.18 | -0.03 | 0.00 | 0.03 | -0.04 | -0.03 | -0.03 | -0.01 | -0.23 | -0.26 | -0.23 |
| pt | 0.11 | 0.10 | 0.06 | 0.14 | 0.14 | -0.13 | -0.02 | -0.07 | -0.03 | -0.06 | -0.06 | 0.00 | 0.01 | -0.08 | -0.07 | -0.03 |
| inr | 0.11 | 0.10 | 0.06 | 0.14 | 0.15 | -0.13 | -0.02 | -0.07 | -0.02 | -0.06 | -0.06 | 0.00 | 0.01 | -0.07 | -0.07 | -0.03 |
| aptt | 0.00 | 0.00 | -0.04 | -0.03 | -0.04 | 0.01 | -0.02 | 0.05 | -0.01 | 0.01 | 0.01 | 0.10 | 0.09 | 0.00 | 0.00 | 0.01 |
| fib | 0.08 | 0.57 | 0.07 | 0.25 | 0.19 | -0.26 | -0.04 | -0.05 | 0.09 | -0.09 | -0.05 | -0.04 | -0.02 | -0.04 | -0.06 | -0.04 |
| tt | 0.07 | -0.03 | 0.02 | 0.04 | 0.05 | -0.04 | -0.01 | 0.00 | 0.00 | -0.05 | -0.04 | -0.03 | -0.03 | -0.10 | -0.11 | -0.07 |
| dd | 0.08 | 0.14 | 0.14 | 0.20 | 0.27 | -0.17 | -0.02 | -0.13 | 0.02 | -0.07 | -0.04 | -0.04 | -0.02 | -0.05 | -0.04 | -0.02 |
| na | -0.05 | -0.13 | 0.06 | -0.07 | 0.09 | 0.11 | 0.01 | -0.12 | -0.04 | 0.11 | 0.10 | 0.03 | 0.05 | 0.13 | 0.13 | 0.10 |
| k | 0.00 | 0.03 | 0.04 | 0.05 | 0.08 | -0.05 | -0.01 | -0.04 | -0.01 | 0.01 | 0.01 | 0.01 | 0.02 | -0.08 | -0.09 | -0.08 |
| cl | -0.01 | -0.07 | 0.10 | 0.00 | 0.13 | 0.04 | 0.04 | -0.15 | -0.03 | 0.04 | 0.04 | 0.03 | 0.05 | -0.01 | -0.01 | 0.03 |
| tp | -0.15 | -0.04 | 0.02 | -0.13 | 0.00 | 0.12 | 0.01 | 0.08 | 0.11 | 0.03 | 0.03 | 0.03 | 0.04 | 0.24 | 0.23 | 0.21 |
| alb | -0.32 | -0.34 | -0.06 | -0.33 | -0.19 | 0.33 | 0.04 | 0.11 | 0.02 | 0.15 | 0.12 | 0.06 | 0.04 | 0.34 | 0.34 | 0.30 |
| a_g_ratio | -0.33 | -0.44 | -0.10 | -0.34 | -0.27 | 0.35 | 0.05 | 0.06 | -0.10 | 0.20 | 0.15 | 0.05 | 0.01 | 0.21 | 0.23 | 0.19 |
| uba | 0.03 | 0.06 | 0.01 | 0.03 | 0.02 | -0.04 | -0.01 | 0.03 | 0.01 | 0.00 | 0.00 | -0.01 | -0.02 | -0.03 | 0.00 | 0.00 |
| tbil | 0.02 | 0.12 | 0.13 | 0.09 | 0.22 | -0.09 | 0.02 | -0.02 | 0.06 | -0.02 | -0.01 | 0.02 | 0.03 | 0.05 | 0.10 | 0.09 |
| dbil | -0.02 | 0.03 | 0.09 | 0.02 | 0.14 | -0.01 | 0.01 | -0.04 | -0.01 | 0.03 | 0.04 | -0.01 | 0.01 | -0.02 | 0.02 | 0.00 |
| alt | 0.00 | 0.05 | 0.02 | 0.05 | 0.05 | -0.04 | -0.01 | -0.03 | 0.00 | -0.03 | -0.02 | -0.02 | -0.01 | -0.02 | -0.01 | 0.00 |
| ast | 0.04 | 0.05 | 0.03 | 0.07 | 0.07 | -0.06 | -0.01 | -0.04 | -0.01 | -0.04 | -0.03 | -0.02 | -0.01 | -0.05 | -0.04 | -0.02 |
| alp | -0.11 | 0.09 | 0.07 | 0.04 | 0.10 | -0.02 | 0.01 | -0.06 | 0.04 | 0.02 | 0.03 | 0.01 | 0.03 | -0.04 | -0.05 | -0.03 |
| ggt | -0.02 | 0.09 | 0.00 | 0.03 | 0.02 | -0.04 | -0.02 | 0.00 | 0.03 | -0.01 | 0.01 | -0.01 | 0.00 | 0.00 | 0.02 | 0.03 |
| bun | 0.20 | 0.30 | 0.13 | 0.30 | 0.27 | -0.30 | -0.02 | -0.10 | 0.05 | -0.12 | -0.09 | -0.07 | -0.02 | -0.19 | -0.21 | -0.18 |
| crea | 0.01 | 0.21 | 0.00 | 0.16 | 0.06 | -0.18 | -0.03 | -0.01 | 0.00 | -0.02 | -0.02 | -0.03 | -0.02 | -0.21 | -0.23 | -0.22 |
| uric | 0.07 | 0.12 | 0.08 | 0.09 | 0.17 | -0.09 | -0.02 | -0.03 | 0.09 | -0.02 | 0.00 | -0.02 | 0.01 | -0.03 | -0.03 | -0.04 |
| il_8 | 0.07 | 0.07 | 0.01 | 0.07 | 0.04 | -0.08 | -0.01 | 0.01 | 0.01 | -0.04 | -0.04 | 0.00 | 0.00 | -0.04 | -0.04 | -0.04 |
| il1b | 0.00 | 0.12 | 0.08 | 0.08 | 0.16 | -0.06 | -0.01 | -0.07 | 0.03 | -0.05 | -0.03 | -0.03 | -0.01 | -0.01 | -0.01 | -0.01 |
| il_6 | 0.10 | 0.28 | 0.12 | 0.20 | 0.26 | -0.18 | -0.02 | -0.09 | 0.02 | -0.09 | -0.08 | -0.03 | 0.00 | -0.04 | -0.05 | -0.03 |
| il_10 | -0.04 | 0.13 | 0.03 | 0.07 | 0.08 | -0.06 | -0.01 | -0.06 | -0.04 | 0.05 | 0.05 | -0.03 | -0.02 | -0.04 | -0.05 | -0.02 |
| tnf_a | -0.03 | 0.09 | 0.03 | 0.00 | 0.04 | 0.01 | 0.01 | -0.04 | -0.02 | 0.05 | 0.03 | -0.02 | -0.01 | -0.02 | -0.02 | -0.02 |
| il_2r | 0.05 | 0.26 | 0.07 | 0.07 | 0.05 | -0.06 | 0.06 | -0.03 | -0.02 | -0.06 | -0.05 | -0.04 | -0.03 | -0.26 | -0.26 | -0.24 |
| st2 | 0.24 | 0.36 | 0.20 | 0.37 | 0.38 | -0.33 | -0.01 | -0.19 | 0.03 | -0.18 | -0.13 | -0.08 | -0.02 | -0.03 | -0.04 | 0.00 |
| charlson_comorbidity_index | 0.50 | 0.12 | 0.01 | 0.10 | 0.02 | -0.15 | 0.00 | 0.08 | 0.07 | -0.02 | -0.02 | -0.01 | 0.00 | -0.20 | -0.19 | -0.12 |

**mvc-a_b_ratio**

|  | mcv | mch | mchc | rdw | plt | pctt | pdw | mpv | apoe | ldlc | hdlc | tch | tg | uapa | uapb | a_b_ratio |
| --- | --- | --- | --- | --- | --- | --- | --- | --- | --- | --- | --- | --- | --- | --- | --- | --- |
| age | 0.14 | 0.12 | 0.01 | -0.06 | -0.15 | -0.16 | 0.00 | 0.02 | -0.07 | -0.18 | -0.03 | -0.17 | -0.21 | -0.13 | -0.14 | 0.00 |
| crp | 0.00 | -0.01 | -0.01 | 0.04 | -0.08 | -0.08 | 0.04 | 0.03 | 0.03 | -0.23 | -0.21 | -0.20 | -0.05 | -0.37 | -0.05 | -0.22 |
| wbc | 0.09 | 0.00 | -0.14 | 0.09 | 0.13 | 0.16 | -0.02 | 0.05 | 0.00 | -0.06 | -0.06 | -0.03 | 0.06 | -0.09 | 0.02 | -0.09 |
| ne_per | -0.08 | -0.07 | 0.00 | -0.04 | 0.05 | 0.05 | 0.09 | -0.01 | 0.06 | -0.17 | -0.07 | -0.12 | -0.03 | -0.22 | -0.03 | -0.12 |
| ne_num | -0.02 | -0.06 | -0.07 | 0.02 | 0.24 | 0.28 | 0.07 | 0.03 | 0.07 | -0.10 | -0.07 | -0.04 | 0.08 | -0.18 | 0.05 | -0.16 |
| ly_per | 0.07 | 0.07 | 0.02 | 0.00 | -0.05 | -0.03 | -0.10 | 0.05 | -0.04 | 0.19 | 0.08 | 0.14 | 0.03 | 0.23 | 0.05 | 0.11 |
| ly_num | 0.12 | 0.04 | -0.12 | 0.09 | -0.02 | -0.01 | -0.07 | 0.05 | -0.04 | -0.02 | -0.02 | -0.02 | 0.01 | 0.00 | -0.02 | 0.01 |
| mo_per | 0.05 | 0.03 | -0.04 | 0.08 | -0.08 | -0.11 | -0.02 | -0.06 | -0.05 | -0.02 | -0.01 | -0.04 | 0.00 | 0.04 | -0.07 | 0.08 |
| mo_num | 0.05 | -0.01 | -0.11 | 0.10 | 0.21 | 0.22 | 0.04 | -0.05 | -0.03 | -0.02 | -0.03 | 0.00 | 0.09 | -0.06 | 0.04 | -0.08 |
| eo_per | 0.03 | 0.03 | 0.01 | 0.02 | 0.06 | 0.05 | -0.01 | -0.06 | -0.04 | 0.12 | 0.01 | 0.08 | 0.02 | 0.07 | 0.03 | 0.03 |
| eo_num | 0.03 | 0.02 | 0.00 | 0.02 | 0.11 | 0.11 | 0.00 | -0.05 | -0.03 | 0.11 | 0.01 | 0.09 | 0.04 | 0.06 | 0.05 | 0.00 |
| ba_per | 0.03 | 0.00 | -0.05 | 0.05 | 0.02 | 0.02 | 0.01 | -0.02 | -0.01 | 0.03 | 0.00 | 0.02 | 0.02 | 0.02 | 0.01 | 0.01 |
| ba_num | 0.03 | -0.01 | -0.06 | 0.02 | 0.09 | 0.09 | 0.03 | -0.01 | 0.02 | 0.03 | 0.00 | 0.04 | 0.05 | 0.00 | 0.06 | -0.03 |
| rbc | -0.34 | -0.28 | 0.03 | -0.20 | 0.07 | 0.12 | 0.07 | 0.08 | 0.05 | 0.09 | 0.07 | 0.10 | 0.07 | 0.13 | 0.12 | 0.00 |
| hgb | 0.05 | 0.16 | 0.28 | -0.34 | -0.01 | 0.04 | 0.10 | 0.10 | 0.07 | 0.10 | 0.10 | 0.12 | 0.09 | 0.14 | 0.13 | -0.01 |
| hct | 0.00 | 0.03 | 0.09 | -0.25 | 0.02 | 0.06 | 0.09 | 0.05 | 0.06 | 0.12 | 0.10 | 0.13 | 0.04 | 0.11 | 0.14 | -0.02 |
| mcv | 1.00 | 0.89 | 0.13 | -0.14 | -0.14 | -0.15 | 0.10 | 0.00 | -0.01 | 0.00 | 0.01 | 0.00 | -0.06 | 0.00 | -0.02 | 0.00 |
| mch | 0.89 | 1.00 | 0.56 | -0.28 | -0.19 | -0.19 | 0.05 | 0.06 | 0.02 | 0.01 | 0.04 | 0.02 | 0.02 | -0.01 | 0.00 | -0.01 |
| mchc | 0.13 | 0.56 | 1.00 | -0.38 | -0.17 | -0.14 | -0.05 | 0.13 | 0.08 | 0.02 | 0.07 | 0.05 | 0.17 | -0.01 | 0.03 | -0.02 |
| rdw | -0.14 | -0.28 | -0.38 | 1.00 | 0.00 | -0.02 | 0.01 | -0.05 | 0.04 | -0.05 | -0.04 | -0.04 | 0.02 | -0.06 | -0.06 | 0.00 |
| plt | -0.14 | -0.19 | -0.17 | 0.00 | 1.00 | 0.94 | -0.13 | -0.39 | -0.04 | 0.17 | 0.03 | 0.17 | 0.07 | 0.08 | 0.20 | -0.11 |
| pctt | -0.15 | -0.19 | -0.14 | -0.02 | 0.94 | 1.00 | -0.17 | -0.12 | 0.00 | 0.16 | 0.02 | 0.17 | 0.10 | 0.07 | 0.20 | -0.12 |
| pdw | 0.10 | 0.05 | -0.05 | 0.01 | -0.13 | -0.17 | 1.00 | -0.04 | 0.04 | -0.03 | -0.04 | -0.02 | 0.07 | -0.06 | 0.01 | -0.05 |
| mpv | 0.00 | 0.06 | 0.13 | -0.05 | -0.39 | -0.12 | -0.04 | 1.00 | 0.08 | -0.06 | -0.06 | -0.05 | 0.03 | -0.08 | -0.03 | -0.02 |
| apoe | -0.01 | 0.02 | 0.08 | 0.04 | -0.04 | 0.00 | 0.04 | 0.08 | 1.00 | 0.27 | 0.33 | 0.46 | 0.59 | 0.14 | 0.32 | -0.15 |
| ldlc | 0.00 | 0.01 | 0.02 | -0.05 | 0.17 | 0.16 | -0.03 | -0.06 | 0.27 | 1.00 | 0.25 | 0.94 | 0.18 | 0.30 | 0.88 | -0.47 |
| hdlc | 0.01 | 0.04 | 0.07 | -0.04 | 0.03 | 0.02 | -0.04 | -0.06 | 0.33 | 0.25 | 1.00 | 0.46 | 0.07 | 0.76 | 0.07 | 0.46 |
| tch | 0.00 | 0.02 | 0.05 | -0.04 | 0.17 | 0.17 | -0.02 | -0.05 | 0.46 | 0.94 | 0.46 | 1.00 | 0.36 | 0.43 | 0.87 | -0.37 |
| tg | -0.06 | 0.02 | 0.17 | 0.02 | 0.07 | 0.10 | 0.07 | 0.03 | 0.59 | 0.18 | 0.07 | 0.36 | 1.00 | 0.00 | 0.35 | -0.24 |
| uapa | 0.00 | -0.01 | -0.01 | -0.06 | 0.08 | 0.07 | -0.06 | -0.08 | 0.14 | 0.30 | 0.76 | 0.43 | 0.00 | 1.00 | 0.14 | 0.54 |
| uapb | -0.02 | 0.00 | 0.03 | -0.06 | 0.20 | 0.20 | 0.01 | -0.03 | 0.32 | 0.88 | 0.07 | 0.87 | 0.35 | 0.14 | 1.00 | -0.66 |
| a_b_ratio | 0.00 | -0.01 | -0.02 | 0.00 | -0.11 | -0.12 | -0.05 | -0.02 | -0.15 | -0.47 | 0.46 | -0.37 | -0.24 | 0.54 | -0.66 | 1.00 |
| ck_mb | -0.05 | -0.06 | -0.03 | 0.01 | -0.01 | -0.01 | 0.01 | 0.01 | 0.05 | 0.09 | 0.04 | 0.09 | 0.03 | 0.02 | 0.06 | -0.03 |
| tni | -0.02 | -0.02 | 0.00 | -0.02 | -0.02 | -0.02 | -0.01 | 0.02 | 0.01 | 0.06 | 0.00 | 0.05 | 0.01 | -0.01 | 0.04 | -0.04 |
| myo | -0.01 | -0.03 | -0.05 | 0.08 | -0.09 | -0.07 | 0.06 | 0.08 | 0.08 | -0.10 | -0.05 | -0.09 | 0.01 | -0.10 | -0.08 | 0.00 |
| nt_probnp | -0.01 | -0.06 | -0.12 | 0.14 | -0.06 | -0.04 | 0.06 | 0.05 | 0.06 | -0.13 | -0.10 | -0.12 | -0.02 | -0.18 | -0.11 | -0.04 |
| pt | 0.03 | 0.03 | -0.01 | 0.05 | -0.08 | -0.07 | 0.04 | 0.05 | -0.02 | -0.12 | -0.14 | -0.15 | -0.08 | -0.19 | -0.11 | -0.05 |
| inr | 0.04 | 0.03 | -0.01 | 0.05 | -0.08 | -0.07 | 0.04 | 0.05 | -0.02 | -0.12 | -0.14 | -0.15 | -0.07 | -0.19 | -0.12 | -0.05 |
| aptt | 0.01 | -0.01 | -0.06 | 0.05 | -0.03 | -0.04 | 0.04 | 0.00 | -0.02 | -0.04 | -0.03 | -0.04 | 0.00 | -0.05 | -0.05 | 0.01 |
| fib | -0.08 | -0.05 | 0.05 | -0.09 | 0.17 | 0.16 | 0.02 | -0.08 | 0.05 | 0.00 | -0.13 | 0.02 | 0.09 | -0.24 | 0.16 | -0.30 |
| tt | 0.02 | -0.01 | -0.05 | 0.08 | -0.08 | -0.07 | 0.00 | 0.08 | 0.01 | -0.07 | -0.04 | -0.07 | 0.00 | -0.07 | -0.07 | 0.01 |
| dd | 0.05 | 0.03 | -0.02 | 0.05 | -0.07 | -0.06 | 0.00 | 0.04 | 0.04 | -0.07 | -0.10 | -0.06 | 0.02 | -0.13 | -0.01 | -0.07 |
| na | 0.10 | 0.00 | -0.18 | -0.02 | 0.07 | 0.12 | 0.07 | 0.11 | 0.06 | 0.12 | -0.05 | 0.11 | 0.08 | 0.06 | 0.15 | -0.09 |
| k | 0.03 | -0.02 | -0.10 | 0.05 | 0.01 | 0.02 | 0.00 | 0.01 | -0.01 | 0.00 | -0.02 | 0.00 | 0.05 | 0.00 | -0.01 | 0.02 |
| cl | 0.07 | 0.01 | -0.13 | 0.02 | 0.00 | 0.04 | 0.06 | 0.12 | 0.07 | 0.09 | -0.04 | 0.08 | 0.06 | 0.00 | 0.11 | -0.09 |
| tp | -0.05 | -0.04 | -0.01 | -0.06 | 0.17 | 0.17 | -0.02 | -0.09 | 0.00 | 0.17 | 0.10 | 0.17 | 0.09 | 0.15 | 0.14 | 0.00 |
| alb | -0.04 | -0.02 | 0.03 | -0.10 | 0.06 | 0.07 | -0.01 | -0.03 | -0.02 | 0.24 | 0.25 | 0.23 | 0.09 | 0.37 | 0.09 | 0.21 |
| a_g_ratio | 0.00 | 0.02 | 0.05 | -0.07 | -0.11 | -0.09 | 0.00 | 0.07 | -0.03 | 0.15 | 0.23 | 0.13 | 0.02 | 0.36 | -0.04 | 0.30 |
| uba | 0.09 | 0.08 | 0.01 | 0.05 | -0.05 | -0.06 | 0.02 | -0.04 | 0.11 | -0.02 | -0.02 | -0.02 | -0.05 | -0.07 | -0.07 | 0.03 |
| tbil | 0.09 | 0.12 | 0.10 | 0.11 | -0.08 | -0.06 | 0.05 | 0.03 | 0.13 | -0.03 | -0.08 | -0.02 | 0.03 | -0.13 | -0.03 | -0.06 |
| dbil | 0.06 | 0.09 | 0.09 | 0.08 | -0.02 | 0.01 | 0.03 | 0.04 | 0.11 | 0.00 | -0.09 | -0.01 | 0.01 | -0.08 | -0.05 | -0.01 |
| alt | 0.00 | 0.03 | 0.06 | -0.02 | -0.04 | -0.04 | 0.03 | 0.05 | 0.04 | -0.02 | -0.05 | -0.02 | 0.00 | -0.05 | -0.02 | -0.01 |
| ast | 0.00 | 0.02 | 0.03 | -0.01 | -0.05 | -0.05 | 0.01 | 0.03 | 0.00 | -0.04 | -0.04 | -0.04 | 0.00 | -0.04 | -0.05 | 0.02 |
| alp | 0.01 | 0.01 | 0.00 | 0.13 | 0.08 | 0.09 | 0.04 | -0.01 | 0.17 | 0.07 | -0.05 | 0.08 | 0.06 | -0.09 | 0.04 | -0.09 |
| ggt | 0.03 | 0.04 | 0.04 | 0.04 | 0.02 | 0.01 | 0.05 | -0.01 | 0.21 | 0.12 | -0.07 | 0.13 | 0.09 | -0.10 | 0.10 | -0.12 |
| bun | 0.06 | -0.01 | -0.12 | 0.09 | -0.06 | -0.02 | 0.06 | 0.12 | 0.04 | -0.17 | -0.16 | -0.14 | 0.04 | -0.24 | -0.07 | -0.12 |
| crea | 0.02 | -0.03 | -0.10 | 0.10 | -0.06 | -0.06 | 0.04 | 0.04 | 0.03 | -0.13 | -0.16 | -0.13 | 0.05 | -0.22 | -0.09 | -0.09 |
| uric | 0.03 | 0.00 | -0.06 | 0.09 | -0.04 | 0.00 | 0.07 | 0.11 | 0.05 | -0.03 | -0.11 | -0.02 | 0.13 | -0.11 | 0.01 | -0.10 |
| il_8 | 0.02 | 0.00 | -0.05 | 0.01 | 0.01 | 0.01 | -0.05 | -0.01 | 0.00 | -0.05 | 0.01 | -0.04 | -0.01 | -0.01 | -0.04 | 0.03 |
| il1b | -0.01 | -0.02 | -0.02 | 0.00 | 0.04 | 0.07 | -0.04 | 0.05 | -0.03 | -0.05 | -0.05 | -0.04 | 0.00 | -0.06 | -0.02 | -0.03 |
| il_6 | 0.01 | -0.01 | -0.06 | 0.06 | -0.09 | -0.08 | 0.05 | 0.08 | 0.05 | -0.13 | -0.03 | -0.10 | -0.01 | -0.14 | -0.08 | -0.02 |
| il_10 | 0.01 | 0.01 | 0.00 | 0.07 | -0.09 | -0.09 | 0.03 | 0.06 | 0.01 | -0.07 | -0.07 | -0.07 | 0.00 | -0.10 | -0.05 | -0.04 |
| tnf_a | 0.01 | 0.00 | -0.01 | 0.00 | -0.06 | -0.03 | 0.02 | 0.11 | -0.02 | -0.05 | -0.05 | -0.05 | -0.01 | -0.07 | -0.03 | -0.02 |
| il_2r | 0.03 | 0.07 | 0.09 | 0.09 | -0.12 | -0.10 | -0.01 | 0.06 | -0.01 | -0.15 | -0.19 | -0.17 | -0.01 | -0.25 | -0.10 | -0.11 |
| st2 | 0.02 | 0.01 | -0.02 | 0.02 | -0.07 | -0.05 | 0.03 | 0.07 | 0.06 | -0.18 | -0.12 | -0.14 | -0.06 | -0.25 | -0.04 | -0.13 |
| charlson_comorbidity_index | 0.10 | 0.04 | -0.09 | 0.16 | -0.09 | -0.11 | -0.05 | -0.02 | -0.03 | -0.10 | -0.11 | -0.11 | -0.06 | -0.15 | -0.05 | -0.07 |

**ck_mb-a_g_ratio**

|  | ck_mb | tni | myo | nt_probnp | pt | inr | aptt | fib | tt | dd | na | k | cl | tp | alb | a_g_ratio |
| --- | --- | --- | --- | --- | --- | --- | --- | --- | --- | --- | --- | --- | --- | --- | --- | --- |
| age | -0.07 | -0.04 | 0.09 | 0.09 | 0.11 | 0.11 | 0.00 | 0.08 | 0.07 | 0.08 | -0.05 | 0.00 | -0.01 | -0.15 | -0.32 | -0.33 |
| crp | -0.03 | 0.00 | 0.22 | 0.20 | 0.10 | 0.10 | 0.00 | 0.57 | -0.03 | 0.14 | -0.13 | 0.03 | -0.07 | -0.04 | -0.34 | -0.44 |
| wbc | 0.05 | 0.04 | 0.09 | 0.03 | 0.06 | 0.06 | -0.04 | 0.07 | 0.02 | 0.14 | 0.06 | 0.04 | 0.10 | 0.02 | -0.06 | -0.10 |
| ne_per | 0.09 | 0.05 | 0.22 | 0.16 | 0.14 | 0.14 | -0.03 | 0.25 | 0.04 | 0.20 | -0.07 | 0.05 | 0.00 | -0.13 | -0.33 | -0.34 |
| ne_num | 0.10 | 0.08 | 0.22 | 0.10 | 0.14 | 0.15 | -0.04 | 0.19 | 0.05 | 0.27 | 0.09 | 0.08 | 0.13 | 0.00 | -0.19 | -0.27 |
| ly_per | -0.09 | -0.06 | -0.20 | -0.18 | -0.13 | -0.13 | 0.01 | -0.26 | -0.04 | -0.17 | 0.11 | -0.05 | 0.04 | 0.12 | 0.33 | 0.35 |
| ly_num | -0.01 | -0.01 | -0.03 | -0.03 | -0.02 | -0.02 | -0.02 | -0.04 | -0.01 | -0.02 | 0.01 | -0.01 | 0.04 | 0.01 | 0.04 | 0.05 |
| mo_per | -0.01 | 0.02 | -0.11 | 0.00 | -0.07 | -0.07 | 0.05 | -0.05 | 0.00 | -0.13 | -0.12 | -0.04 | -0.15 | 0.08 | 0.11 | 0.06 |
| mo_num | 0.04 | 0.09 | 0.00 | 0.03 | -0.03 | -0.02 | -0.01 | 0.09 | 0.00 | 0.02 | -0.04 | -0.01 | -0.03 | 0.11 | 0.02 | -0.10 |
| eo_per | -0.06 | -0.04 | -0.11 | -0.04 | -0.06 | -0.06 | 0.01 | -0.09 | -0.05 | -0.07 | 0.11 | 0.01 | 0.04 | 0.03 | 0.15 | 0.20 |
| eo_num | -0.05 | -0.04 | -0.09 | -0.03 | -0.06 | -0.06 | 0.01 | -0.05 | -0.04 | -0.04 | 0.10 | 0.01 | 0.04 | 0.03 | 0.12 | 0.15 |
| ba_per | -0.02 | -0.02 | -0.05 | -0.03 | 0.00 | 0.00 | 0.10 | -0.04 | -0.03 | -0.04 | 0.03 | 0.01 | 0.03 | 0.03 | 0.06 | 0.05 |
| ba_num | -0.01 | -0.01 | -0.03 | -0.01 | 0.01 | 0.01 | 0.09 | -0.02 | -0.03 | -0.02 | 0.05 | 0.02 | 0.05 | 0.04 | 0.04 | 0.01 |
| rbc | 0.06 | 0.03 | -0.04 | -0.23 | -0.08 | -0.07 | 0.00 | -0.04 | -0.10 | -0.05 | 0.13 | -0.08 | -0.01 | 0.24 | 0.34 | 0.21 |
| hgb | 0.03 | 0.02 | -0.05 | -0.26 | -0.07 | -0.07 | 0.00 | -0.06 | -0.11 | -0.04 | 0.13 | -0.09 | -0.01 | 0.23 | 0.34 | 0.23 |
| hct | 0.06 | 0.05 | -0.01 | -0.23 | -0.03 | -0.03 | 0.01 | -0.04 | -0.07 | -0.02 | 0.10 | -0.08 | 0.03 | 0.21 | 0.30 | 0.19 |
| mcv | -0.05 | -0.02 | -0.01 | -0.01 | 0.03 | 0.04 | 0.01 | -0.08 | 0.02 | 0.05 | 0.10 | 0.03 | 0.07 | -0.05 | -0.04 | 0.00 |
| mch | -0.06 | -0.02 | -0.03 | -0.06 | 0.03 | 0.03 | -0.01 | -0.05 | -0.01 | 0.03 | 0.00 | -0.02 | 0.01 | -0.04 | -0.02 | 0.02 |
| mchc | -0.03 | 0.00 | -0.05 | -0.12 | -0.01 | -0.01 | -0.06 | 0.05 | -0.05 | -0.02 | -0.18 | -0.10 | -0.13 | -0.01 | 0.03 | 0.05 |
| rdw | 0.01 | -0.02 | 0.08 | 0.14 | 0.05 | 0.05 | 0.05 | -0.09 | 0.08 | 0.05 | -0.02 | 0.05 | 0.02 | -0.06 | -0.10 | -0.07 |
| plt | -0.01 | -0.02 | -0.09 | -0.06 | -0.08 | -0.08 | -0.03 | 0.17 | -0.08 | -0.07 | 0.07 | 0.01 | 0.00 | 0.17 | 0.06 | -0.11 |
| pctt | -0.01 | -0.02 | -0.07 | -0.04 | -0.07 | -0.07 | -0.04 | 0.16 | -0.07 | -0.06 | 0.12 | 0.02 | 0.04 | 0.17 | 0.07 | -0.09 |
| pdw | 0.01 | -0.01 | 0.06 | 0.06 | 0.04 | 0.04 | 0.04 | 0.02 | 0.00 | 0.00 | 0.07 | 0.00 | 0.06 | -0.02 | -0.01 | 0.00 |
| mpv | 0.01 | 0.02 | 0.08 | 0.05 | 0.05 | 0.05 | 0.00 | -0.08 | 0.08 | 0.04 | 0.11 | 0.01 | 0.12 | -0.09 | -0.03 | 0.07 |
| apoe | 0.05 | 0.01 | 0.08 | 0.06 | -0.02 | -0.02 | -0.02 | 0.05 | 0.01 | 0.04 | 0.06 | -0.01 | 0.07 | 0.00 | -0.02 | -0.03 |
| ldlc | 0.09 | 0.06 | -0.10 | -0.13 | -0.12 | -0.12 | -0.04 | 0.00 | -0.07 | -0.07 | 0.12 | 0.00 | 0.09 | 0.17 | 0.24 | 0.15 |
| hdlc | 0.04 | 0.00 | -0.05 | -0.10 | -0.14 | -0.14 | -0.03 | -0.13 | -0.04 | -0.10 | -0.05 | -0.02 | -0.04 | 0.10 | 0.25 | 0.23 |
| tch | 0.09 | 0.05 | -0.09 | -0.12 | -0.15 | -0.15 | -0.04 | 0.02 | -0.07 | -0.06 | 0.11 | 0.00 | 0.08 | 0.17 | 0.23 | 0.13 |
| tg | 0.03 | 0.01 | 0.01 | -0.02 | -0.08 | -0.07 | 0.00 | 0.09 | 0.00 | 0.02 | 0.08 | 0.05 | 0.06 | 0.09 | 0.09 | 0.02 |
| uapa | 0.02 | -0.01 | -0.10 | -0.18 | -0.19 | -0.19 | -0.05 | -0.24 | -0.07 | -0.13 | 0.06 | 0.00 | 0.00 | 0.15 | 0.37 | 0.36 |
| uapb | 0.06 | 0.04 | -0.08 | -0.11 | -0.11 | -0.12 | -0.05 | 0.16 | -0.07 | -0.01 | 0.15 | -0.01 | 0.11 | 0.14 | 0.09 | -0.04 |
| a_b_ratio | -0.03 | -0.04 | 0.00 | -0.04 | -0.05 | -0.05 | 0.01 | -0.30 | 0.01 | -0.07 | -0.09 | 0.02 | -0.09 | 0.00 | 0.21 | 0.30 |
| ck_mb | 1.00 | 0.74 | 0.42 | 0.03 | 0.01 | 0.01 | 0.07 | 0.01 | 0.06 | 0.05 | 0.01 | 0.02 | -0.02 | -0.02 | 0.04 | 0.10 |
| tni | 0.74 | 1.00 | 0.28 | 0.05 | 0.03 | 0.03 | 0.10 | 0.04 | 0.09 | 0.04 | -0.02 | 0.02 | -0.06 | -0.03 | 0.03 | 0.08 |
| myo | 0.42 | 0.28 | 1.00 | 0.20 | 0.15 | 0.15 | 0.16 | 0.04 | 0.24 | 0.25 | 0.04 | 0.17 | 0.05 | -0.06 | -0.11 | -0.10 |
| nt_probnp | 0.03 | 0.05 | 0.20 | 1.00 | 0.12 | 0.12 | 0.10 | 0.05 | 0.13 | 0.13 | -0.13 | 0.13 | -0.15 | -0.06 | -0.15 | -0.16 |
| pt | 0.01 | 0.03 | 0.15 | 0.12 | 1.00 | 1.00 | 0.33 | -0.07 | 0.26 | 0.24 | 0.00 | 0.12 | 0.10 | -0.07 | -0.12 | -0.10 |
| inr | 0.01 | 0.03 | 0.15 | 0.12 | 1.00 | 1.00 | 0.33 | -0.07 | 0.26 | 0.24 | 0.00 | 0.12 | 0.10 | -0.06 | -0.12 | -0.10 |
| aptt | 0.07 | 0.10 | 0.16 | 0.10 | 0.33 | 0.33 | 1.00 | -0.06 | 0.50 | 0.02 | -0.04 | 0.08 | -0.01 | 0.00 | 0.00 | 0.00 |
| fib | 0.01 | 0.04 | 0.04 | 0.05 | -0.07 | -0.07 | -0.06 | 1.00 | -0.23 | -0.12 | -0.08 | 0.04 | -0.07 | 0.08 | -0.20 | -0.40 |
| tt | 0.06 | 0.09 | 0.24 | 0.13 | 0.26 | 0.26 | 0.50 | -0.23 | 1.00 | 0.17 | 0.01 | 0.11 | 0.11 | -0.11 | -0.13 | -0.05 |
| dd | 0.05 | 0.04 | 0.25 | 0.13 | 0.24 | 0.24 | 0.02 | -0.12 | 0.17 | 1.00 | 0.06 | 0.07 | 0.10 | -0.02 | -0.14 | -0.17 |
| na | 0.01 | -0.02 | 0.04 | -0.13 | 0.00 | 0.00 | -0.04 | -0.08 | 0.01 | 0.06 | 1.00 | -0.04 | 0.77 | 0.01 | 0.05 | 0.10 |
| k | 0.02 | 0.02 | 0.17 | 0.13 | 0.12 | 0.12 | 0.08 | 0.04 | 0.11 | 0.07 | -0.04 | 1.00 | 0.04 | 0.15 | 0.10 | -0.01 |
| cl | -0.02 | -0.06 | 0.05 | -0.15 | 0.10 | 0.10 | -0.01 | -0.07 | 0.11 | 0.10 | 0.77 | 0.04 | 1.00 | -0.09 | -0.08 | 0.01 |
| tp | -0.02 | -0.03 | -0.06 | -0.06 | -0.07 | -0.06 | 0.00 | 0.08 | -0.11 | -0.02 | 0.01 | 0.15 | -0.09 | 1.00 | 0.73 | -0.08 |
| alb | 0.04 | 0.03 | -0.11 | -0.15 | -0.12 | -0.12 | 0.00 | -0.20 | -0.13 | -0.14 | 0.05 | 0.10 | -0.08 | 0.73 | 1.00 | 0.60 |
| a_g_ratio | 0.10 | 0.08 | -0.10 | -0.16 | -0.10 | -0.10 | 0.00 | -0.40 | -0.05 | -0.17 | 0.10 | -0.01 | 0.01 | -0.08 | 0.60 | 1.00 |
| uba | 0.00 | 0.00 | 0.11 | 0.01 | 0.11 | 0.11 | 0.04 | -0.02 | 0.00 | 0.07 | -0.09 | -0.01 | -0.05 | 0.04 | -0.03 | -0.08 |
| tbil | 0.05 | 0.05 | 0.17 | 0.10 | 0.16 | 0.17 | 0.05 | -0.04 | 0.07 | 0.25 | -0.07 | -0.04 | -0.05 | 0.07 | 0.02 | -0.04 |
| dbil | 0.04 | 0.05 | 0.14 | 0.09 | 0.13 | 0.13 | 0.04 | -0.02 | 0.05 | 0.18 | 0.01 | -0.01 | 0.02 | -0.11 | -0.05 | 0.05 |
| alt | 0.25 | 0.48 | 0.33 | 0.05 | 0.07 | 0.07 | 0.19 | 0.00 | 0.21 | 0.11 | -0.06 | 0.12 | -0.03 | -0.03 | -0.04 | -0.02 |
| ast | 0.28 | 0.47 | 0.36 | 0.08 | 0.11 | 0.11 | 0.20 | -0.03 | 0.23 | 0.24 | -0.06 | 0.14 | -0.03 | -0.02 | -0.04 | -0.03 |
| alp | 0.02 | 0.02 | 0.01 | 0.06 | 0.01 | 0.01 | 0.03 | 0.08 | 0.00 | 0.08 | -0.03 | 0.05 | -0.02 | 0.07 | -0.04 | -0.14 |
| ggt | -0.02 | 0.01 | 0.00 | 0.01 | 0.01 | 0.01 | 0.03 | 0.09 | -0.01 | 0.01 | -0.06 | 0.01 | -0.01 | 0.04 | -0.04 | -0.09 |
| bun | -0.01 | -0.01 | 0.32 | 0.39 | 0.15 | 0.15 | 0.12 | 0.20 | 0.18 | 0.10 | 0.08 | 0.37 | 0.07 | 0.03 | -0.19 | -0.29 |
| crea | -0.01 | 0.00 | 0.26 | 0.52 | 0.03 | 0.03 | 0.10 | 0.18 | 0.11 | 0.03 | -0.07 | 0.28 | -0.13 | 0.07 | -0.08 | -0.18 |
| uric | 0.06 | 0.07 | 0.29 | 0.23 | 0.11 | 0.11 | 0.08 | 0.05 | 0.16 | 0.09 | 0.13 | 0.27 | 0.13 | 0.11 | 0.03 | -0.08 |
| il_8 | 0.00 | 0.01 | 0.05 | 0.02 | 0.06 | 0.07 | 0.01 | 0.02 | 0.01 | 0.04 | 0.03 | 0.01 | 0.03 | -0.05 | -0.07 | -0.04 |
| il1b | 0.01 | 0.03 | 0.04 | 0.05 | 0.03 | 0.03 | -0.01 | 0.08 | 0.01 | 0.07 | 0.06 | -0.02 | 0.04 | -0.03 | -0.10 | -0.09 |
| il_6 | 0.04 | 0.05 | 0.32 | 0.12 | 0.17 | 0.17 | 0.05 | 0.10 | 0.06 | 0.21 | 0.01 | 0.08 | 0.06 | -0.08 | -0.15 | -0.13 |
| il_10 | 0.01 | 0.01 | 0.16 | 0.09 | 0.13 | 0.13 | 0.03 | 0.01 | 0.13 | 0.24 | -0.01 | 0.07 | 0.02 | -0.05 | -0.04 | 0.00 |
| tnf_a | 0.01 | 0.03 | 0.04 | 0.07 | 0.07 | 0.07 | 0.03 | 0.04 | 0.02 | 0.04 | 0.01 | 0.07 | 0.00 | 0.01 | -0.02 | -0.03 |
| il_2r | -0.02 | -0.01 | 0.11 | 0.20 | 0.07 | 0.07 | 0.03 | 0.11 | 0.15 | 0.09 | -0.15 | 0.10 | -0.11 | -0.05 | -0.21 | -0.21 |
| st2 | 0.08 | 0.10 | 0.19 | 0.15 | 0.23 | 0.23 | 0.03 | 0.16 | 0.08 | 0.17 | -0.05 | 0.07 | 0.04 | -0.08 | -0.29 | -0.32 |
| charlson_comorbidity_index | 0.00 | 0.03 | 0.10 | 0.17 | 0.07 | 0.07 | 0.03 | 0.07 | 0.10 | 0.07 | -0.03 | 0.10 | 0.06 | -0.11 | -0.24 | -0.22 |

**uba-charlson_comorbidity_index**

|  | uba | tbil | dbil | alt | ast | alp | ggt | bun | crea | uric | il_8 | il1b | il_6 | il_10 | tnf_a | il_2r | st2 | charlson_comorbidity_index |
| --- | --- | --- | --- | --- | --- | --- | --- | --- | --- | --- | --- | --- | --- | --- | --- | --- | --- | --- |
| age | 0.03 | 0.02 | -0.02 | 0.00 | 0.04 | -0.11 | -0.02 | 0.20 | 0.01 | 0.07 | 0.07 | 0.00 | 0.10 | -0.04 | -0.03 | 0.05 | 0.24 | 0.50 |
| crp | 0.06 | 0.12 | 0.03 | 0.05 | 0.05 | 0.09 | 0.09 | 0.30 | 0.21 | 0.12 | 0.07 | 0.12 | 0.28 | 0.13 | 0.09 | 0.26 | 0.36 | 0.12 |
| wbc | 0.01 | 0.13 | 0.09 | 0.02 | 0.03 | 0.07 | 0.00 | 0.13 | 0.00 | 0.08 | 0.01 | 0.08 | 0.12 | 0.03 | 0.03 | 0.07 | 0.20 | 0.01 |
| ne_per | 0.03 | 0.09 | 0.02 | 0.05 | 0.07 | 0.04 | 0.03 | 0.30 | 0.16 | 0.09 | 0.07 | 0.08 | 0.20 | 0.07 | 0.00 | 0.07 | 0.37 | 0.10 |
| ne_num | 0.02 | 0.22 | 0.14 | 0.05 | 0.07 | 0.10 | 0.02 | 0.27 | 0.06 | 0.17 | 0.04 | 0.16 | 0.26 | 0.08 | 0.04 | 0.05 | 0.38 | 0.02 |
| ly_per | -0.04 | -0.09 | -0.01 | -0.04 | -0.06 | -0.02 | -0.04 | -0.30 | -0.18 | -0.09 | -0.08 | -0.06 | -0.18 | -0.06 | 0.01 | -0.06 | -0.33 | -0.15 |
| ly_num | -0.01 | 0.02 | 0.01 | -0.01 | -0.01 | 0.01 | -0.02 | -0.02 | -0.03 | -0.02 | -0.01 | -0.01 | -0.02 | -0.01 | 0.01 | 0.06 | -0.01 | 0.00 |
| mo_per | 0.03 | -0.02 | -0.04 | -0.03 | -0.04 | -0.06 | 0.00 | -0.10 | -0.01 | -0.03 | 0.01 | -0.07 | -0.09 | -0.06 | -0.04 | -0.03 | -0.19 | 0.08 |
| mo_num | 0.01 | 0.06 | -0.01 | 0.00 | -0.01 | 0.04 | 0.03 | 0.05 | 0.00 | 0.09 | 0.01 | 0.03 | 0.02 | -0.04 | -0.02 | -0.02 | 0.03 | 0.07 |
| eo_per | 0.00 | -0.02 | 0.03 | -0.03 | -0.04 | 0.02 | -0.01 | -0.12 | -0.02 | -0.02 | -0.04 | -0.05 | -0.09 | 0.05 | 0.05 | -0.06 | -0.18 | -0.02 |
| eo_num | 0.00 | -0.01 | 0.04 | -0.02 | -0.03 | 0.03 | 0.01 | -0.09 | -0.02 | 0.00 | -0.04 | -0.03 | -0.08 | 0.05 | 0.03 | -0.05 | -0.13 | -0.02 |
| ba_per | -0.01 | 0.02 | -0.01 | -0.02 | -0.02 | 0.01 | -0.01 | -0.07 | -0.03 | -0.02 | 0.00 | -0.03 | -0.03 | -0.03 | -0.02 | -0.04 | -0.08 | -0.01 |
| ba_num | -0.02 | 0.03 | 0.01 | -0.01 | -0.01 | 0.03 | 0.00 | -0.02 | -0.02 | 0.01 | 0.00 | -0.01 | 0.00 | -0.02 | -0.01 | -0.03 | -0.02 | 0.00 |
| rbc | -0.03 | 0.05 | -0.02 | -0.02 | -0.05 | -0.04 | 0.00 | -0.19 | -0.21 | -0.03 | -0.04 | -0.01 | -0.04 | -0.04 | -0.02 | -0.26 | -0.03 | -0.20 |
| hgb | 0.00 | 0.10 | 0.02 | -0.01 | -0.04 | -0.05 | 0.02 | -0.21 | -0.23 | -0.03 | -0.04 | -0.01 | -0.05 | -0.05 | -0.02 | -0.26 | -0.04 | -0.19 |
| hct | 0.00 | 0.09 | 0.00 | 0.00 | -0.02 | -0.03 | 0.03 | -0.18 | -0.22 | -0.04 | -0.04 | -0.01 | -0.03 | -0.02 | -0.02 | -0.24 | 0.00 | -0.12 |
| mcv | 0.09 | 0.09 | 0.06 | 0.00 | 0.00 | 0.01 | 0.03 | 0.06 | 0.02 | 0.03 | 0.02 | -0.01 | 0.01 | 0.01 | 0.01 | 0.03 | 0.02 | 0.10 |
| mch | 0.08 | 0.12 | 0.09 | 0.03 | 0.02 | 0.01 | 0.04 | -0.01 | -0.03 | 0.00 | 0.00 | -0.02 | -0.01 | 0.01 | 0.00 | 0.07 | 0.01 | 0.04 |
| mchc | 0.01 | 0.10 | 0.09 | 0.06 | 0.03 | 0.00 | 0.04 | -0.12 | -0.10 | -0.06 | -0.05 | -0.02 | -0.06 | 0.00 | -0.01 | 0.09 | -0.02 | -0.09 |
| rdw | 0.05 | 0.11 | 0.08 | -0.02 | -0.01 | 0.13 | 0.04 | 0.09 | 0.10 | 0.09 | 0.01 | 0.00 | 0.06 | 0.07 | 0.00 | 0.09 | 0.02 | 0.16 |
| plt | -0.05 | -0.08 | -0.02 | -0.04 | -0.05 | 0.08 | 0.02 | -0.06 | -0.06 | -0.04 | 0.01 | 0.04 | -0.09 | -0.09 | -0.06 | -0.12 | -0.07 | -0.09 |
| pctt | -0.06 | -0.06 | 0.01 | -0.04 | -0.05 | 0.09 | 0.01 | -0.02 | -0.06 | 0.00 | 0.01 | 0.07 | -0.08 | -0.09 | -0.03 | -0.10 | -0.05 | -0.11 |
| pdw | 0.02 | 0.05 | 0.03 | 0.03 | 0.01 | 0.04 | 0.05 | 0.06 | 0.04 | 0.07 | -0.05 | -0.04 | 0.05 | 0.03 | 0.02 | -0.01 | 0.03 | -0.05 |
| mpv | -0.04 | 0.03 | 0.04 | 0.05 | 0.03 | -0.01 | -0.01 | 0.12 | 0.04 | 0.11 | -0.01 | 0.05 | 0.08 | 0.06 | 0.11 | 0.06 | 0.07 | -0.02 |
| apoe | 0.11 | 0.13 | 0.11 | 0.04 | 0.00 | 0.17 | 0.21 | 0.04 | 0.03 | 0.05 | 0.00 | -0.03 | 0.05 | 0.01 | -0.02 | -0.01 | 0.06 | -0.03 |
| ldlc | -0.02 | -0.03 | 0.00 | -0.02 | -0.04 | 0.07 | 0.12 | -0.17 | -0.13 | -0.03 | -0.05 | -0.05 | -0.13 | -0.07 | -0.05 | -0.15 | -0.18 | -0.10 |
| hdlc | -0.02 | -0.08 | -0.09 | -0.05 | -0.04 | -0.05 | -0.07 | -0.16 | -0.16 | -0.11 | 0.01 | -0.05 | -0.03 | -0.07 | -0.05 | -0.19 | -0.12 | -0.11 |
| tch | -0.02 | -0.02 | -0.01 | -0.02 | -0.04 | 0.08 | 0.13 | -0.14 | -0.13 | -0.02 | -0.04 | -0.04 | -0.10 | -0.07 | -0.05 | -0.17 | -0.14 | -0.11 |
| tg | -0.05 | 0.03 | 0.01 | 0.00 | 0.00 | 0.06 | 0.09 | 0.04 | 0.05 | 0.13 | -0.01 | 0.00 | -0.01 | 0.00 | -0.01 | -0.01 | -0.06 | -0.06 |
| uapa | -0.07 | -0.13 | -0.08 | -0.05 | -0.04 | -0.09 | -0.10 | -0.24 | -0.22 | -0.11 | -0.01 | -0.06 | -0.14 | -0.10 | -0.07 | -0.25 | -0.25 | -0.15 |
| uapb | -0.07 | -0.03 | -0.05 | -0.02 | -0.05 | 0.04 | 0.10 | -0.07 | -0.09 | 0.01 | -0.04 | -0.02 | -0.08 | -0.05 | -0.03 | -0.10 | -0.04 | -0.05 |
| a_b_ratio | 0.03 | -0.06 | -0.01 | -0.01 | 0.02 | -0.09 | -0.12 | -0.12 | -0.09 | -0.10 | 0.03 | -0.03 | -0.02 | -0.04 | -0.02 | -0.11 | -0.13 | -0.07 |
| ck_mb | 0.00 | 0.05 | 0.04 | 0.25 | 0.28 | 0.02 | -0.02 | -0.01 | -0.01 | 0.06 | 0.00 | 0.01 | 0.04 | 0.01 | 0.01 | -0.02 | 0.08 | 0.00 |
| tni | 0.00 | 0.05 | 0.05 | 0.48 | 0.47 | 0.02 | 0.01 | -0.01 | 0.00 | 0.07 | 0.01 | 0.03 | 0.05 | 0.01 | 0.03 | -0.01 | 0.10 | 0.03 |
| myo | 0.11 | 0.17 | 0.14 | 0.33 | 0.36 | 0.01 | 0.00 | 0.32 | 0.26 | 0.29 | 0.05 | 0.04 | 0.32 | 0.16 | 0.04 | 0.11 | 0.19 | 0.10 |
| nt_probnp | 0.01 | 0.10 | 0.09 | 0.05 | 0.08 | 0.06 | 0.01 | 0.39 | 0.52 | 0.23 | 0.02 | 0.05 | 0.12 | 0.09 | 0.07 | 0.20 | 0.15 | 0.17 |
| pt | 0.11 | 0.16 | 0.13 | 0.07 | 0.11 | 0.01 | 0.01 | 0.15 | 0.03 | 0.11 | 0.06 | 0.03 | 0.17 | 0.13 | 0.07 | 0.07 | 0.23 | 0.07 |
| inr | 0.11 | 0.17 | 0.13 | 0.07 | 0.11 | 0.01 | 0.01 | 0.15 | 0.03 | 0.11 | 0.07 | 0.03 | 0.17 | 0.13 | 0.07 | 0.07 | 0.23 | 0.07 |
| aptt | 0.04 | 0.05 | 0.04 | 0.19 | 0.20 | 0.03 | 0.03 | 0.12 | 0.10 | 0.08 | 0.01 | -0.01 | 0.05 | 0.03 | 0.03 | 0.03 | 0.03 | 0.03 |
| fib | -0.02 | -0.04 | -0.02 | 0.00 | -0.03 | 0.08 | 0.09 | 0.20 | 0.18 | 0.05 | 0.02 | 0.08 | 0.10 | 0.01 | 0.04 | 0.11 | 0.16 | 0.07 |
| tt | 0.00 | 0.07 | 0.05 | 0.21 | 0.23 | 0.00 | -0.01 | 0.18 | 0.11 | 0.16 | 0.01 | 0.01 | 0.06 | 0.13 | 0.02 | 0.15 | 0.08 | 0.10 |
| dd | 0.07 | 0.25 | 0.18 | 0.11 | 0.24 | 0.08 | 0.01 | 0.10 | 0.03 | 0.09 | 0.04 | 0.07 | 0.21 | 0.24 | 0.04 | 0.09 | 0.17 | 0.07 |
| na | -0.09 | -0.07 | 0.01 | -0.06 | -0.06 | -0.03 | -0.06 | 0.08 | -0.07 | 0.13 | 0.03 | 0.06 | 0.01 | -0.01 | 0.01 | -0.15 | -0.05 | -0.03 |
| k | -0.01 | -0.04 | -0.01 | 0.12 | 0.14 | 0.05 | 0.01 | 0.37 | 0.28 | 0.27 | 0.01 | -0.02 | 0.08 | 0.07 | 0.07 | 0.10 | 0.07 | 0.10 |
| cl | -0.05 | -0.05 | 0.02 | -0.03 | -0.03 | -0.02 | -0.01 | 0.07 | -0.13 | 0.13 | 0.03 | 0.04 | 0.06 | 0.02 | 0.00 | -0.11 | 0.04 | 0.06 |
| tp | 0.04 | 0.07 | -0.11 | -0.03 | -0.02 | 0.07 | 0.04 | 0.03 | 0.07 | 0.11 | -0.05 | -0.03 | -0.08 | -0.05 | 0.01 | -0.05 | -0.08 | -0.11 |
| alb | -0.03 | 0.02 | -0.05 | -0.04 | -0.04 | -0.04 | -0.04 | -0.19 | -0.08 | 0.03 | -0.07 | -0.10 | -0.15 | -0.04 | -0.02 | -0.21 | -0.29 | -0.24 |
| a_g_ratio | -0.08 | -0.04 | 0.05 | -0.02 | -0.03 | -0.14 | -0.09 | -0.29 | -0.18 | -0.08 | -0.04 | -0.09 | -0.13 | 0.00 | -0.03 | -0.21 | -0.32 | -0.22 |
| uba | 1.00 | 0.47 | 0.44 | 0.15 | 0.05 | 0.39 | 0.42 | 0.01 | -0.01 | 0.00 | -0.01 | 0.01 | 0.13 | 0.05 | 0.01 | 0.05 | 0.12 | 0.05 |
| tbil | 0.47 | 1.00 | 0.77 | 0.16 | 0.10 | 0.31 | 0.37 | 0.00 | -0.04 | 0.08 | 0.01 | 0.01 | 0.15 | 0.16 | 0.03 | 0.12 | 0.14 | -0.01 |
| dbil | 0.44 | 0.77 | 1.00 | 0.18 | 0.11 | 0.31 | 0.40 | -0.04 | -0.05 | 0.01 | 0.02 | 0.01 | 0.11 | 0.11 | 0.03 | 0.07 | 0.11 | -0.02 |
| alt | 0.15 | 0.16 | 0.18 | 1.00 | 0.91 | 0.18 | 0.22 | 0.04 | 0.03 | 0.09 | 0.02 | 0.00 | 0.04 | 0.05 | 0.02 | 0.04 | 0.10 | 0.05 |
| ast | 0.05 | 0.10 | 0.11 | 0.91 | 1.00 | 0.08 | 0.09 | 0.06 | 0.05 | 0.11 | 0.03 | 0.01 | 0.06 | 0.09 | 0.03 | 0.05 | 0.09 | 0.07 |
| alp | 0.39 | 0.31 | 0.31 | 0.18 | 0.08 | 1.00 | 0.65 | 0.03 | 0.03 | 0.05 | -0.02 | 0.01 | 0.01 | 0.02 | 0.01 | 0.09 | 0.08 | -0.01 |
| ggt | 0.42 | 0.37 | 0.40 | 0.22 | 0.09 | 0.65 | 1.00 | 0.01 | -0.01 | 0.01 | -0.02 | 0.00 | 0.00 | -0.01 | 0.00 | 0.04 | 0.09 | 0.05 |
| bun | 0.01 | 0.00 | -0.04 | 0.04 | 0.06 | 0.03 | 0.01 | 1.00 | 0.72 | 0.55 | 0.03 | 0.04 | 0.22 | 0.08 | 0.10 | 0.21 | 0.28 | 0.24 |
| crea | -0.01 | -0.04 | -0.05 | 0.03 | 0.05 | 0.03 | -0.01 | 0.72 | 1.00 | 0.33 | 0.00 | -0.01 | 0.10 | 0.08 | 0.09 | 0.20 | 0.09 | 0.17 |
| uric | 0.00 | 0.08 | 0.01 | 0.09 | 0.11 | 0.05 | 0.01 | 0.55 | 0.33 | 1.00 | 0.02 | 0.03 | 0.11 | 0.11 | 0.11 | 0.17 | 0.10 | 0.13 |
| il_8 | -0.01 | 0.01 | 0.02 | 0.02 | 0.03 | -0.02 | -0.02 | 0.03 | 0.00 | 0.02 | 1.00 | 0.16 | 0.28 | 0.15 | 0.14 | 0.03 | 0.09 | 0.04 |
| il1b | 0.01 | 0.01 | 0.01 | 0.00 | 0.01 | 0.01 | 0.00 | 0.04 | -0.01 | 0.03 | 0.16 | 1.00 | 0.14 | 0.12 | 0.07 | 0.04 | 0.07 | -0.01 |
| il_6 | 0.13 | 0.15 | 0.11 | 0.04 | 0.06 | 0.01 | 0.00 | 0.22 | 0.10 | 0.11 | 0.28 | 0.14 | 1.00 | 0.38 | 0.17 | 0.14 | 0.18 | 0.08 |
| il_10 | 0.05 | 0.16 | 0.11 | 0.05 | 0.09 | 0.02 | -0.01 | 0.08 | 0.08 | 0.11 | 0.15 | 0.12 | 0.38 | 1.00 | 0.35 | 0.33 | 0.10 | 0.02 |
| tnf_a | 0.01 | 0.03 | 0.03 | 0.02 | 0.03 | 0.01 | 0.00 | 0.10 | 0.09 | 0.11 | 0.14 | 0.07 | 0.17 | 0.35 | 1.00 | 0.18 | 0.15 | -0.01 |
| il_2r | 0.05 | 0.12 | 0.07 | 0.04 | 0.05 | 0.09 | 0.04 | 0.21 | 0.20 | 0.17 | 0.03 | 0.04 | 0.14 | 0.33 | 0.18 | 1.00 | 0.15 | 0.12 |
| st2 | 0.12 | 0.14 | 0.11 | 0.10 | 0.09 | 0.08 | 0.09 | 0.28 | 0.09 | 0.10 | 0.09 | 0.07 | 0.18 | 0.10 | 0.15 | 0.15 | 1.00 | 0.19 |
| charlson_comorbidity_index | 0.05 | -0.01 | -0.02 | 0.05 | 0.07 | -0.01 | 0.05 | 0.24 | 0.17 | 0.13 | 0.04 | -0.01 | 0.08 | 0.02 | -0.01 | 0.12 | 0.19 | 1.00 |
